# Supplementary material
Source: ML conference proceedings conference paper supplement (https://openreview.net/forum?id=r9zzTQLnxw)

FICO - Accuracy

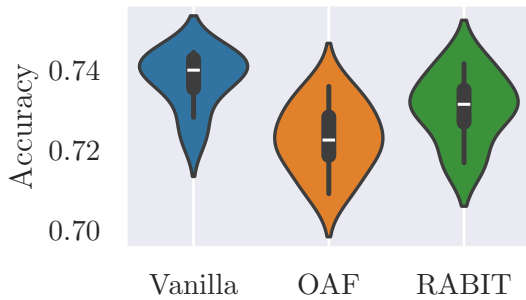

COMPAS - Accuracy

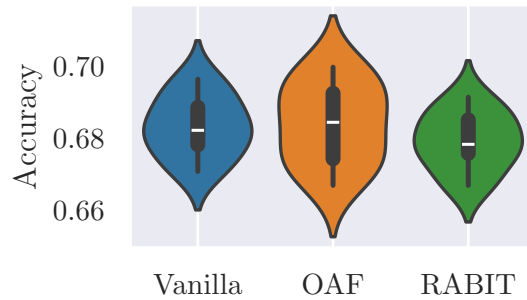

Adult - Accuracy

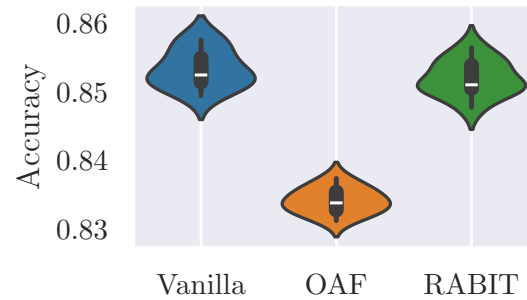

Bail - Accuracy

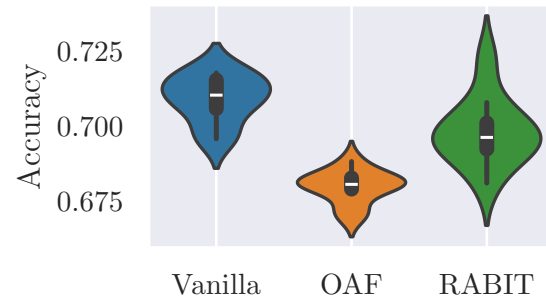

FICO - Recourse

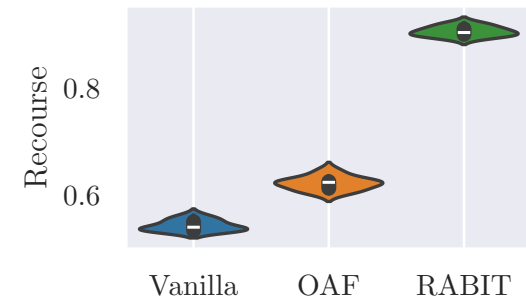

COMPAS - Recourse

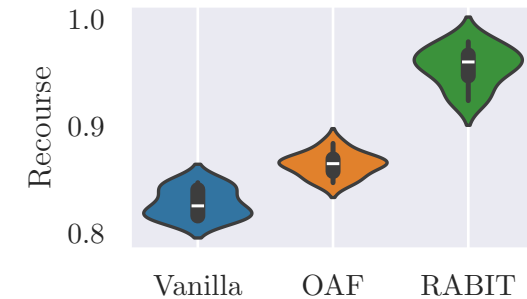

Adult - Recourse

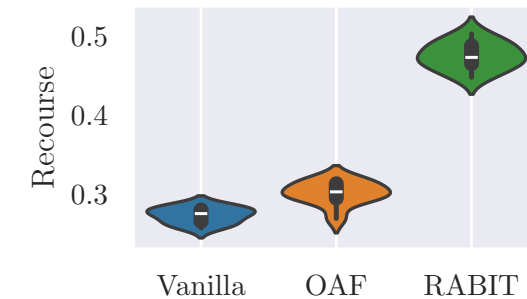

Bail - Recourse

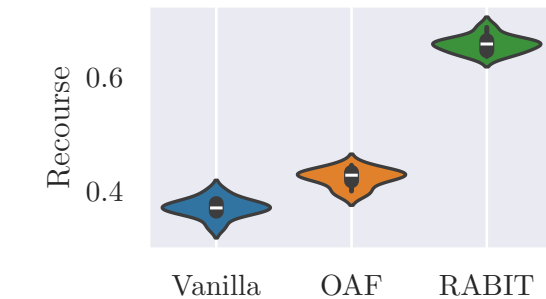

Supplement: supplementary_material [file 04_01_trees_150.pdf › rabit-main/figures/04_01_trees_150.pdf]
