# Supplementary material
Source: ML conference proceedings conference paper supplement (https://openreview.net/forum?id=r9zzTQLnxw)

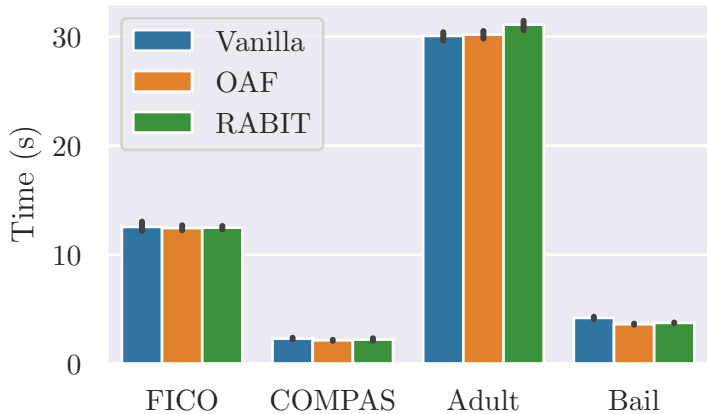

Supplement: supplementary_material [file 01_02_time.pdf › rabit-main/figures/01_02_time.pdf]

FICO - AUC

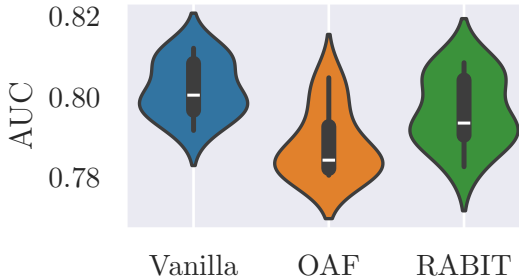

COMPAS - AUC

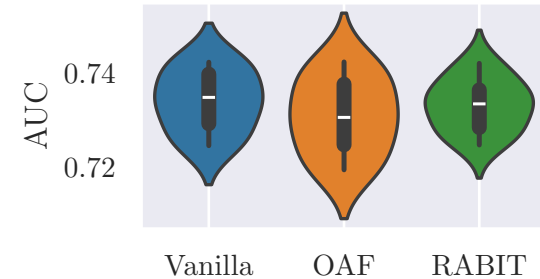

Adult - AUC

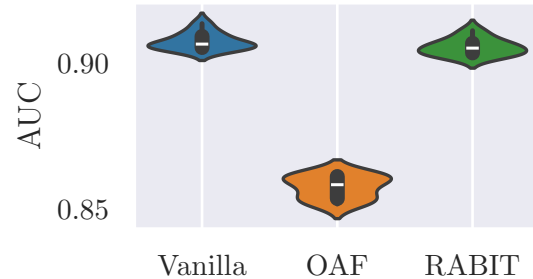

Bail - AUC

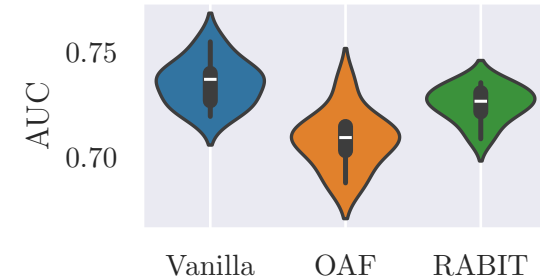

Supplement: supplementary_material [file 01_03_comparison_auc.pdf › rabit-main/figures/01_03_comparison_auc.pdf]

FICO - F1

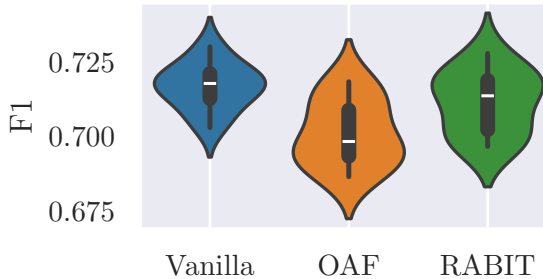

COMPAS - F1

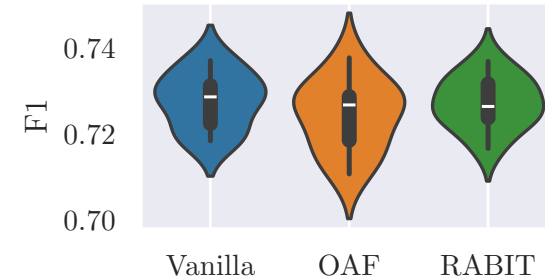

Adult - F1

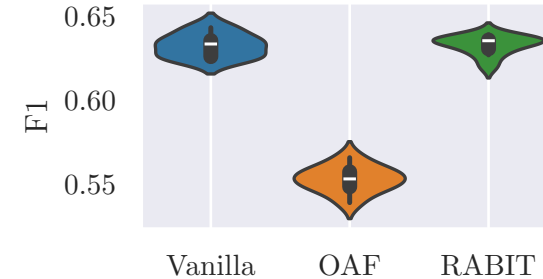

Bail - F1

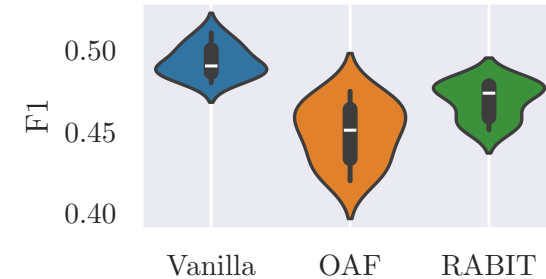

Supplement: supplementary_material [file 01_04_comparison_f1.pdf › rabit-main/figures/01_04_comparison_f1.pdf]

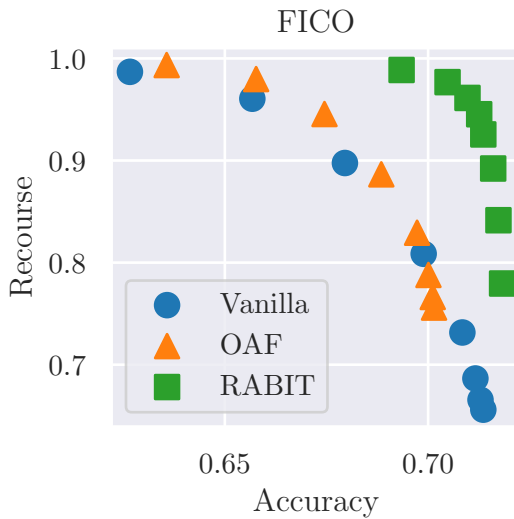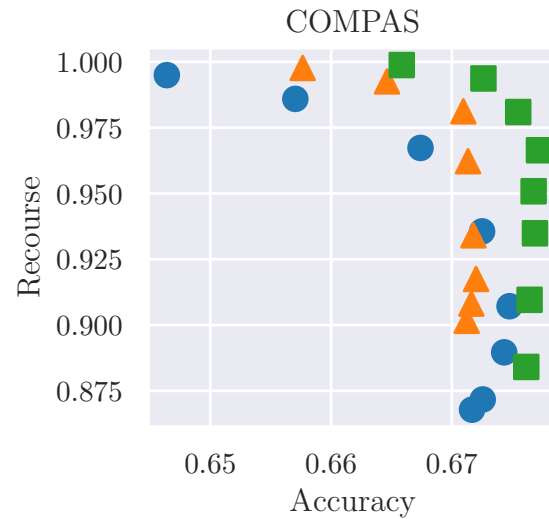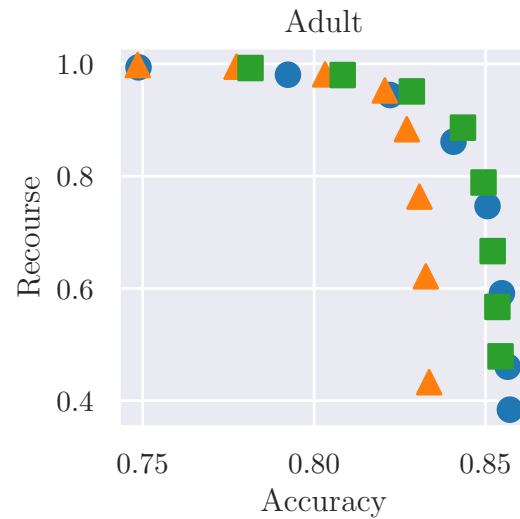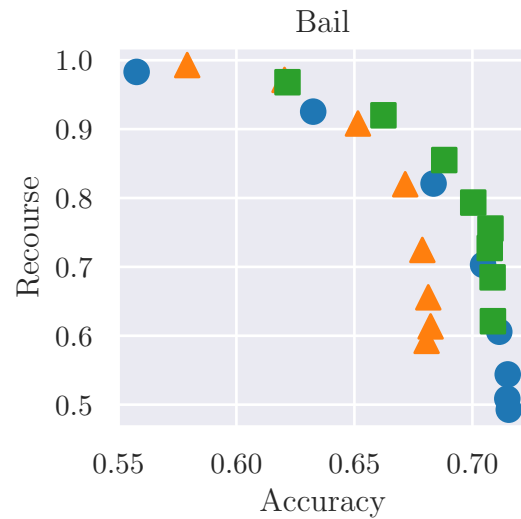

Supplement: supplementary_material [file 03_leaf_refinement.pdf › rabit-main/figures/03_leaf_refinement.pdf]

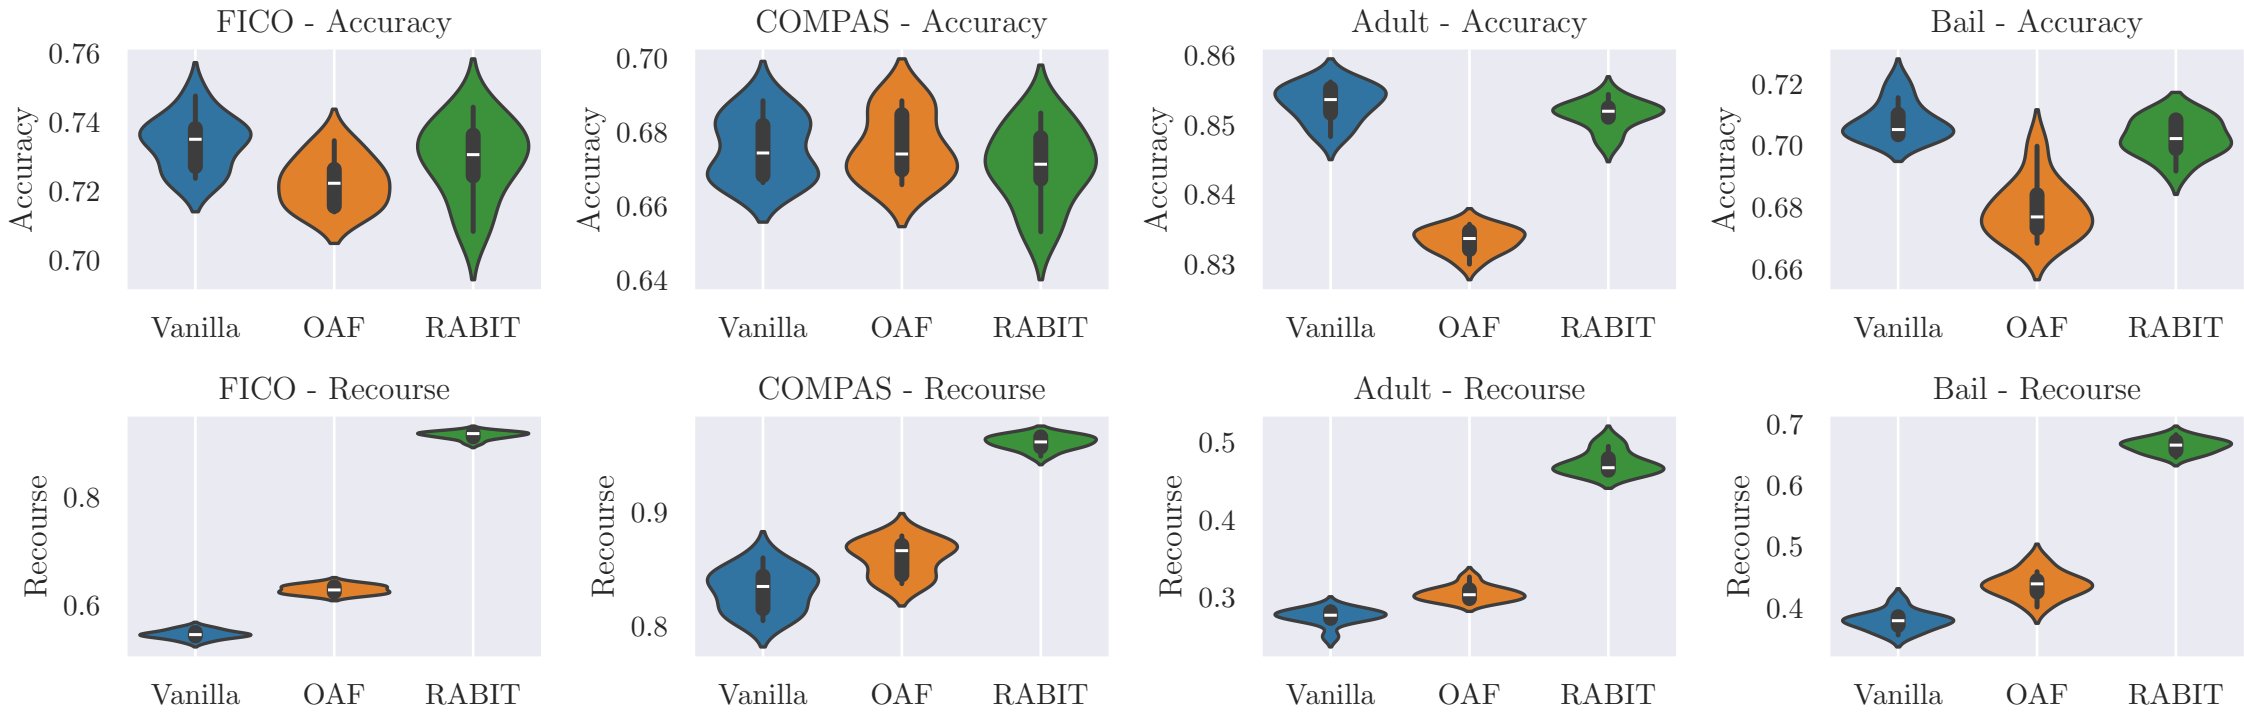

Supplement: supplementary_material [file 04_01_trees_250.pdf › rabit-main/figures/04_01_trees_250.pdf]

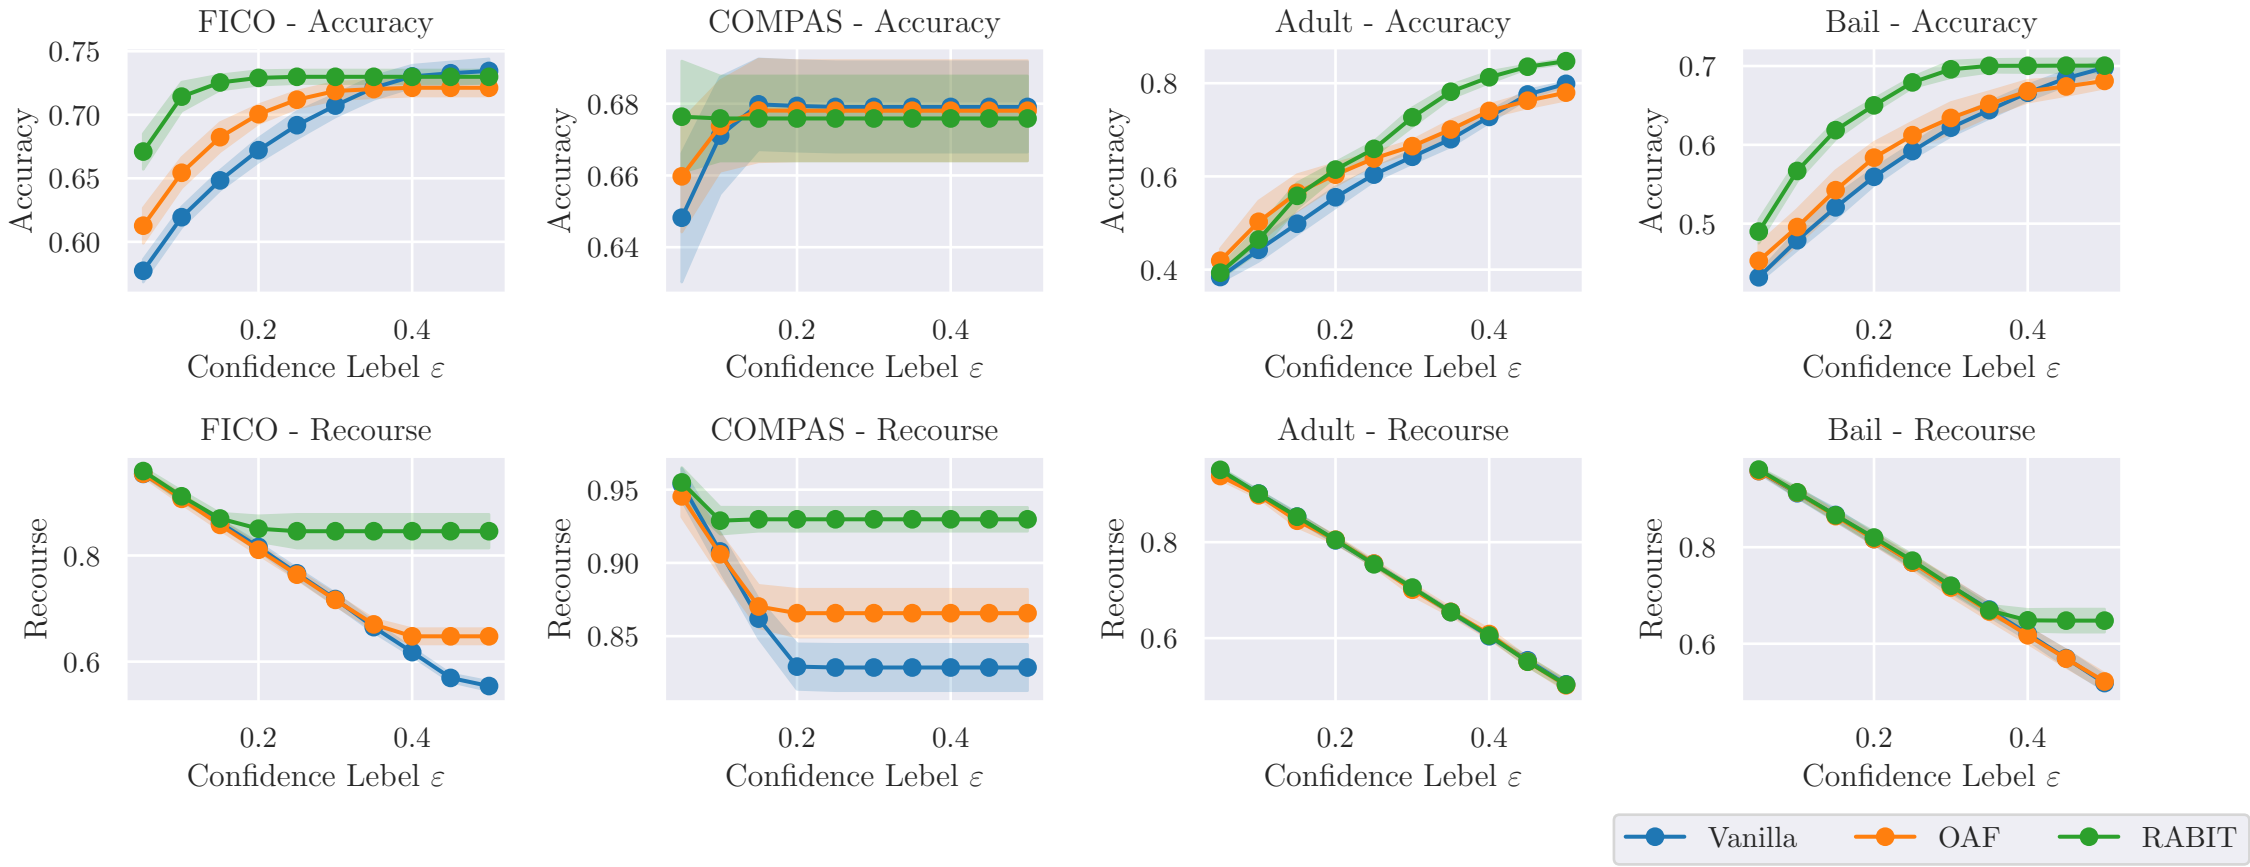

Supplement: supplementary_material [file 05_intercept_adjustment.pdf › rabit-main/figures/05_intercept_adjustment.pdf]
